# Supplementary material
Source: PubMed Central journal article supplement (PMC10112135)
Supplement: iai.00535-22-s0001.pdf [file iai.00535-22-s0001.pdf]

**Supplementary Table 1** Contents of Tyr and 3-MH in skeletal muscle tissues of rats

| Group   | Tyr (nmol/g)                | 3-MH (nmol/g)            |
|---------|-----------------------------|--------------------------|
| Sham    | 302.41 ± 31.42              | 1.04 ± 0.12              |
| CLP     | 584.41 ± 35.41*             | 5.14 ± 0.23*             |
| oe-NC   | 561.12 ± 45.57              | 5.34 ± 0.44              |
| oe-RNF7 | 712.25 ± 41.12 <sup>#</sup> | 7.52 ± 0.64 <sup>#</sup> |
| sh-NC   | 565.12 ± 45.57              | 5.48 ± 0.44              |
| sh-RNF7 | 384.52 ± 39.52 <sup>#</sup> | 2.52 ± 0.41 <sup>#</sup> |

\*  $p < 0.05$  vs. sham-operated rats and #  $p < 0.05$  vs. CLP rats treated with sh-NC or oe-NC. N = 10 for rats upon each treatment.

**Supplementary Table 2** Measurement of oxidative stress-related factor activity

| Group   | SOD<br>(U/mg)                | MDA<br>(nmol/mg)          | CAT (U/mg)                | NO (umol/g)              | GSH-PX<br>(U/mg)           |
|---------|------------------------------|---------------------------|---------------------------|--------------------------|----------------------------|
| Sham    | 81.42 ±<br>8.12              | 3.51 ± 0.41               | 21.41 ± 1.42              | 0.50 ± 0.06              | 90.04 ± 10.06              |
| CLP     | 20.41 ±<br>2.41*             | 17.58 ± 1.16*             | 5.41 ± 0.52*              | 3.04 ± 0.32*             | 38.08 ± 3.29*              |
| oe-NC   | 21.41 ±<br>2.41              | 18.58 ± 1.16              | 5.71 ± 0.52               | 3.14 ± 0.32              | 38.28 ± 3.29               |
| oe-RNF7 | 10.04 ±<br>0.53 <sup>#</sup> | 31.52 ± 0.89 <sup>#</sup> | 2.25 ± 0.13 <sup>#</sup>  | 5.78 ± 0.52 <sup>#</sup> | 20.41 ± 2.26 <sup>#</sup>  |
| sh-NC   | 20.81 ±<br>2.41              | 17.88 ± 1.16              | 5.24 ± 0.52               | 3.08 ± 0.32              | 37.89 ± 3.29               |
| sh-RNF7 | 49.94 ±<br>4.26 <sup>#</sup> | 13.01 ± 0.79 <sup>#</sup> | 10.89 ± 0.98 <sup>#</sup> | 1.81 ± 0.14 <sup>#</sup> | 64.04 ± 11.75 <sup>#</sup> |

\*  $p < 0.05$  vs. sham-operated rats and #  $p < 0.05$  vs. CLP rats treated with sh-NC or oe-NC. N = 10 for rats upon each treatment.

**Supplementary Table 3** Measurement of the levels of proinflammatory factors

| Group   | TNF- $\alpha$ (pg/mL)          | IL-6 (pg/mL)                  | IL-1 $\beta$ (pg/mL)           |
|---------|--------------------------------|-------------------------------|--------------------------------|
| Sham    | 25.41 $\pm$ 2.41               | 30.65 $\pm$ 2.69              | 20.41 $\pm$ 3.64               |
| CLP     | 78.54 $\pm$ 6.80*              | 75.54 $\pm$ 6.37*             | 91.27 $\pm$ 8.69*              |
| oe-NC   | 77.54 $\pm$ 6.80               | 73.54 $\pm$ 6.37              | 89.27 $\pm$ 8.69               |
| oe-RNF7 | 109.85 $\pm$ 8.19 <sup>#</sup> | 97.24 $\pm$ 5.63 <sup>#</sup> | 129.41 $\pm$ 6.27 <sup>#</sup> |
| sh-NC   | 77.68 $\pm$ 6.80               | 74.65 $\pm$ 6.37              | 92.02 $\pm$ 8.69               |
| sh-RNF7 | 52.24 $\pm$ 5.29 <sup>#</sup>  | 50.01 $\pm$ 4.15 <sup>#</sup> | 63.14 $\pm$ 5.88 <sup>#</sup>  |

\*  $p < 0.05$  vs. sham-operated rats and #  $p < 0.05$  vs. CLP rats treated with sh-NC or oe-NC. N = 10 for rats upon each treatment.

**Supplementary Table 4** Primer sequences for RT-qPCR

| Gene                    | Sequences                                                                  |
|-------------------------|----------------------------------------------------------------------------|
| RNF7<br>(rat)           | Forward: 5'-TCCTTTCCTCGCATTCTGGG-3'<br>Reverse: 5'-AAGACAGGCATCTGGACCCT-3' |
| THBS1<br>(rat)          | Forward: 5'-TTTGCGGAGAGGACACAGAC-3'<br>Reverse: 5'-TCATAGTCTTCCTGCCCCGA-3' |
| $\beta$ -actin<br>(rat) | Forward: 5'-CCACCATGTACCCAGGCATT-3'<br>Reverse: 5'-CGGACTCATCGTACTCCTGC-3' |

RT-qPCR: reverse transcription quantitative polymerase chain reaction; THBS1: thrombospondin 1; F: forward; R: reverse.

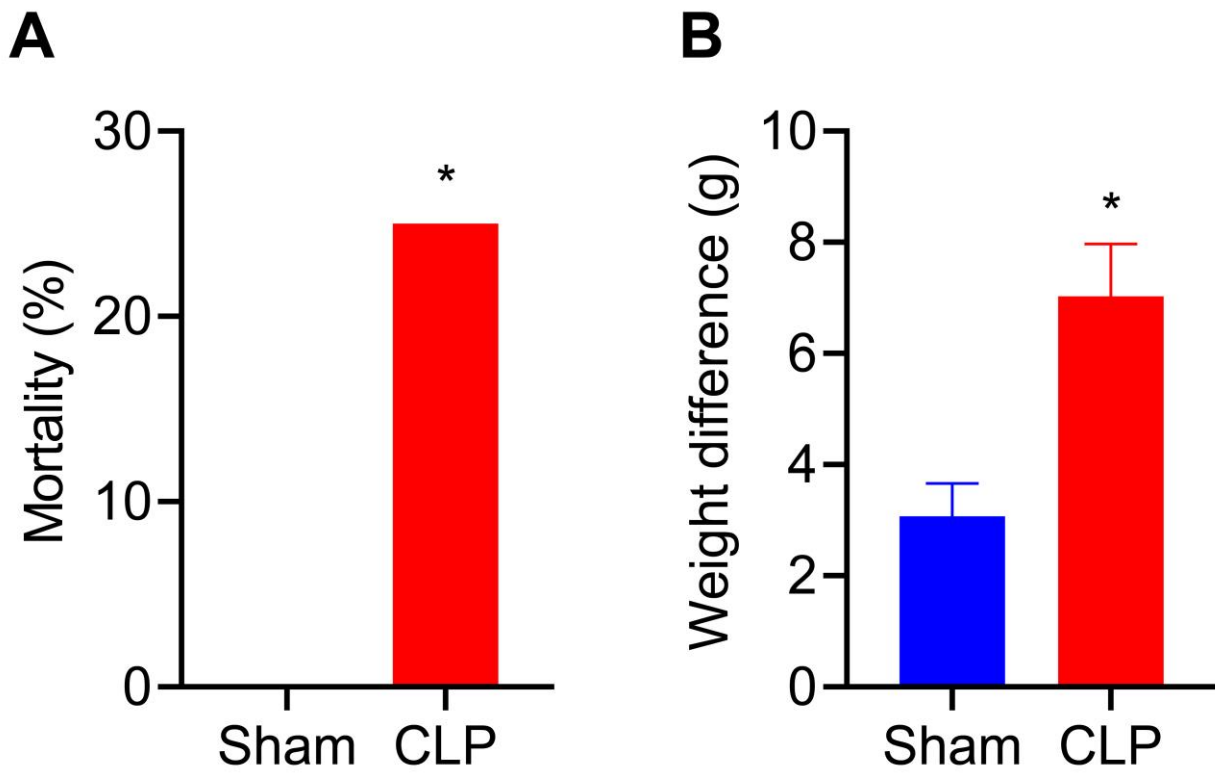

**SUPPLEMENTARY FIG 1** A, Postoperative death and survival of sham-operated rats (n=15) and CLP rats (n=120) (1 week). B, Postoperative weight difference between Sham and CLP model rats (1 week). \*  $p < 0.05$  vs. sham-operated rats.

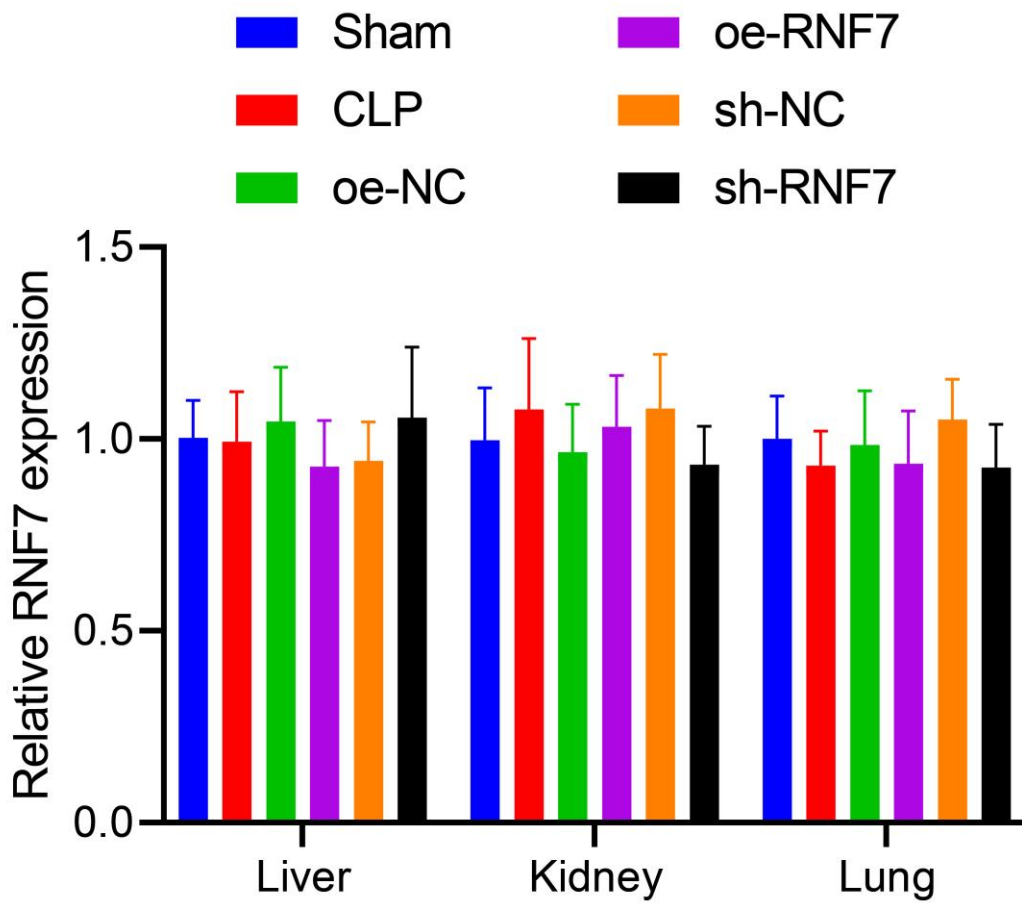

**SUPPLEMENTARY FIG 2** RT-qPCR analysis of RNF7 expression in the rat liver, kidney, and

lung tissues upon each treatment. N = 10.
